# Supplementary material for: Assessing Soil Biodiversity Potentials in China: A Multi-Attribute Decision Approach
Source: MDPI journal article supplement (doi:10.3390/agronomy13112822), 2023-11-15
Supplement: s1 [file s1]

Archive with 1 entries (1 files):
- agronomy-2696506-supplementary.pdf
