# Supplementary material for: Assessing Soil Biodiversity Potentials in China: A Multi-Attribute Decision Approach
Source: MDPI journal article supplement (doi:10.3390/agronomy13112822), 2023-11-15
Supplement: s1 [file s1 › agronomy-2696506-supplementary.pdf]

## Tables

|    | Fungal richness | Bacterial abundance | Nematode abundance | Earthworm diversity | Soil biodiversity potentials |
|----|-----------------|---------------------|--------------------|---------------------|------------------------------|
|    | 36%             | 21%                 | 21%                | 21%                 |                              |
| 1  | Low             | Low                 | Low                | Low                 | Low                          |
| 2  | Low             | Low                 | Low                | Medium              | Low                          |
| 3  | Low             | Low                 | Low                | High                | Relatively low               |
| 4  | Low             | Low                 | Medium             | Low                 | Low                          |
| 5  | Low             | Low                 | Medium             | Medium              | Relatively low               |
| 6  | Low             | Low                 | Medium             | High                | Relatively low               |
| 7  | Low             | Low                 | High               | Low                 | Relatively low               |
| 8  | Low             | Low                 | High               | Medium              | Relatively low               |
| 9  | Low             | Low                 | High               | High                | Medium                       |
| 10 | Low             | Medium              | Low                | Low                 | Low                          |
| 11 | Low             | Medium              | Low                | Medium              | Relatively low               |
| 12 | Low             | Medium              | Low                | High                | Relatively low               |
| 13 | Low             | Medium              | Medium             | Low                 | Relatively low               |
| 14 | Low             | Medium              | Medium             | Medium              | Relatively low               |
| 15 | Low             | Medium              | Medium             | High                | Medium                       |
| 16 | Low             | Medium              | High               | Low                 | Relatively low               |
| 17 | Low             | Medium              | High               | Medium              | Medium                       |
| 18 | Low             | Medium              | High               | High                | Medium                       |
| 19 | Low             | High                | Low                | Low                 | Relatively low               |
| 20 | Low             | High                | Low                | Medium              | Relatively low               |
| 21 | Low             | High                | Low                | High                | Medium                       |
| 22 | Low             | High                | Medium             | Low                 | Relatively low               |
| 23 | Low             | High                | Medium             | Medium              | Medium                       |
| 24 | Low             | High                | Medium             | High                | Medium                       |
| 25 | Low             | High                | High               | Low                 | Medium                       |
| 26 | Low             | High                | High               | Medium              | Medium                       |
| 27 | Low             | High                | High               | High                | Relatively high              |
| 28 | Medium          | Low                 | Low                | Low                 | Relatively low               |
| 29 | Medium          | Low                 | Low                | Medium              | Relatively low               |
| 30 | Medium          | Low                 | Low                | High                | Medium                       |
| 31 | Medium          | Low                 | Medium             | Low                 | Relatively low               |
| 32 | Medium          | Low                 | Medium             | Medium              | Medium                       |
| 33 | Medium          | Low                 | Medium             | High                | Medium                       |
| 34 | Medium          | Low                 | High               | Low                 | Medium                       |
| 35 | Medium          | Low                 | High               | Medium              | Medium                       |
| 36 | Medium          | Low                 | High               | High                | Medium                       |
| 37 | Medium          | Medium              | Low                | Low                 | Relatively low               |
| 38 | Medium          | Medium              | Low                | Medium              | Medium                       |
| 39 | Medium          | Medium              | Low                | High                | Medium                       |
| 40 | Medium          | Medium              | Medium             | Low                 | Medium                       |
| 41 | Medium          | Medium              | Medium             | Medium              | Medium                       |
| 42 | Medium          | Medium              | Medium             | High                | Medium                       |
| 43 | Medium          | Medium              | High               | Low                 | Medium                       |
| 44 | Medium          | Medium              | High               | Medium              | Medium                       |
| 45 | Medium          | Medium              | High               | High                | Relatively high              |
| 46 | Medium          | High                | Low                | Low                 | Medium                       |
| 47 | Medium          | High                | Low                | Medium              | Medium                       |
| 48 | Medium          | High                | Low                | High                | Medium                       |
| 49 | Medium          | High                | Medium             | Low                 | Medium                       |
| 50 | Medium          | High                | Medium             | Medium              | Medium                       |
| 51 | Medium          | High                | Medium             | High                | Relatively high              |
| 52 | Medium          | High                | High               | Low                 | Medium                       |
| 53 | Medium          | High                | High               | Medium              | Relatively high              |
| 54 | Medium          | High                | High               | High                | Relatively high              |
| 55 | High            | Low                 | Low                | Low                 | Relatively low               |
| 56 | High            | Low                 | Low                | Medium              | Medium                       |
| 57 | High            | Low                 | Low                | High                | Medium                       |
| 58 | High            | Low                 | Medium             | Low                 | Medium                       |
| 59 | High            | Low                 | Medium             | Medium              | Medium                       |
| 60 | High            | Low                 | Medium             | High                | Relatively high              |
| 61 | High            | Low                 | High               | Low                 | Medium                       |
| 62 | High            | Low                 | High               | Medium              | Relatively high              |
| 63 | High            | Low                 | High               | High                | Relatively high              |
| 64 | High            | Medium              | Low                | Low                 | Medium                       |
| 65 | High            | Medium              | Low                | Medium              | Medium                       |
| 66 | High            | Medium              | Low                | High                | Relatively high              |
| 67 | High            | Medium              | Medium             | Low                 | Medium                       |

|    |             |             |             |             |                        |
|----|-------------|-------------|-------------|-------------|------------------------|
| 68 | <i>High</i> | Medium      | Medium      | Medium      | <i>Relatively high</i> |
| 69 | <i>High</i> | Medium      | Medium      | <i>High</i> | <i>Relatively high</i> |
| 70 | <i>High</i> | Medium      | <i>High</i> | <i>Low</i>  | <i>Relatively high</i> |
| 71 | <i>High</i> | Medium      | <i>High</i> | Medium      | <i>Relatively high</i> |
| 72 | <i>High</i> | Medium      | <i>High</i> | <i>High</i> | <i>High</i>            |
| 73 | <i>High</i> | <i>High</i> | <i>Low</i>  | <i>Low</i>  | Medium                 |
| 74 | <i>High</i> | <i>High</i> | <i>Low</i>  | Medium      | <i>Relatively high</i> |
| 75 | <i>High</i> | <i>High</i> | <i>Low</i>  | <i>High</i> | <i>Relatively high</i> |
| 76 | <i>High</i> | <i>High</i> | Medium      | <i>Low</i>  | <i>Relatively high</i> |
| 77 | <i>High</i> | <i>High</i> | Medium      | Medium      | <i>Relatively high</i> |
| 78 | <i>High</i> | <i>High</i> | Medium      | <i>High</i> | <i>High</i>            |
| 79 | <i>High</i> | <i>High</i> | <i>High</i> | <i>Low</i>  | <i>Relatively high</i> |
| 80 | <i>High</i> | <i>High</i> | <i>High</i> | Medium      | <i>High</i>            |
| 81 | <i>High</i> | <i>High</i> | <i>High</i> | <i>High</i> | <i>High</i>            |

| Climate | Soil (0–5 cm)     | Fungal richness |
|---------|-------------------|-----------------|
| 67%     | 33%               |                 |
| 1       | <i>Unsuitable</i> | <i>Low</i>      |
| 2       | <i>Unsuitable</i> | <i>Low</i>      |
| 3       | <i>Suitable</i>   | Medium          |
| 4       | <i>Unsuitable</i> | Medium          |
| 5       | General           | Medium          |
| 6       | <i>Suitable</i>   | Medium          |
| 7       | <i>Unsuitable</i> | Medium          |
| 8       | General           | <i>High</i>     |
| 9       | <i>Suitable</i>   | <i>High</i>     |

| Arid/humid Region | Temperature Zone                 | Climate           |
|-------------------|----------------------------------|-------------------|
| 43%               | 57%                              |                   |
| 1                 | <i>Subfrigid/Cold-temp. zone</i> | <i>Unsuitable</i> |
| 2                 | Middle temp. zone                | <i>Unsuitable</i> |
| 3                 | Warm temp. zone                  | <i>Unsuitable</i> |
| 4                 | Subtropical zone                 | General           |
| 5                 | <i>Tropical zone</i>             | General           |
| 6                 | <i>Subfrigid/Cold-temp. zone</i> | <i>Unsuitable</i> |
| 7                 | Middle temp. zone                | <i>Unsuitable</i> |
| 8                 | Warm temp. zone                  | General           |
| 9                 | Subtropical zone                 | General           |
| 10                | <i>Tropical zone</i>             | General           |
| 11                | <i>Subfrigid/Cold-temp. zone</i> | <i>Unsuitable</i> |
| 12                | Middle temp. zone                | General           |
| 13                | Warm temp. zone                  | General           |
| 14                | Subtropical zone                 | General           |
| 15                | <i>Tropical zone</i>             | <i>Suitable</i>   |
| 16                | <i>Subfrigid/Cold-temp. zone</i> | <i>Unsuitable</i> |
| 17                | Middle temp. zone                | General           |
| 18                | Warm temp. zone                  | General           |
| 19                | Subtropical zone                 | <i>Suitable</i>   |
| 20                | <i>Tropical zone</i>             | <i>Suitable</i>   |

|    | pH (0–5 cm) | CEC (0–5 cm, cmol(+)/kg) | Total P (0–5 cm, g/kg) | Soil (0–5 cm) |
|----|-------------|--------------------------|------------------------|---------------|
|    | 50%         | 25%                      | 25%                    |               |
| 1  | 7.9–9.4     | 4.6–15.1                 | 0.63–1.94              | Unsuitable    |
| 2  | 7.9–9.4     | 4.6–15.1                 | 0.49–0.63              | Unsuitable    |
| 3  | 7.9–9.4     | 4.6–15.1                 | 0.12–0.49              | Unsuitable    |
| 4  | 7.9–9.4     | 15.1–24.2                | 0.63–1.94              | Unsuitable    |
| 5  | 7.9–9.4     | 15.1–24.2                | 0.49–0.63              | Unsuitable    |
| 6  | 7.9–9.4     | 15.1–24.2                | 0.12–0.49              | General       |
| 7  | 7.9–9.4     | 24.2–98.5                | 0.63–1.94              | Unsuitable    |
| 8  | 7.9–9.4     | 24.2–98.5                | 0.49–0.63              | General       |
| 9  | 7.9–9.4     | 24.2–98.5                | 0.12–0.49              | General       |
| 10 | 6.0–7.9     | 4.6–15.1                 | 0.63–1.94              | Unsuitable    |
| 11 | 6.0–7.9     | 4.6–15.1                 | 0.49–0.63              | General       |
| 12 | 6.0–7.9     | 4.6–15.1                 | 0.12–0.49              | General       |
| 13 | 6.0–7.9     | 15.1–24.2                | 0.63–1.94              | General       |
| 14 | 6.0–7.9     | 15.1–24.2                | 0.49–0.63              | General       |
| 15 | 6.0–7.9     | 15.1–24.2                | 0.12–0.49              | General       |
| 16 | 6.0–7.9     | 24.2–98.5                | 0.63–1.94              | General       |
| 17 | 6.0–7.9     | 24.2–98.5                | 0.49–0.63              | General       |
| 18 | 6.0–7.9     | 24.2–98.5                | 0.12–0.49              | Suitable      |
| 19 | 3.6–6.0     | 4.6–15.1                 | 0.63–1.94              | General       |
| 20 | 3.6–6.0     | 4.6–15.1                 | 0.49–0.63              | General       |
| 21 | 3.6–6.0     | 4.6–15.1                 | 0.12–0.49              | Suitable      |
| 22 | 3.6–6.0     | 15.1–24.2                | 0.63–1.94              | General       |
| 23 | 3.6–6.0     | 15.1–24.2                | 0.49–0.63              | Suitable      |
| 24 | 3.6–6.0     | 15.1–24.2                | 0.12–0.49              | Suitable      |
| 25 | 3.6–6.0     | 24.2–98.5                | 0.63–1.94              | Suitable      |
| 26 | 3.6–6.0     | 24.2–98.5                | 0.49–0.63              | Suitable      |
| 27 | 3.6–6.0     | 24.2–98.5                | 0.12–0.49              | Suitable      |

| Climate | Soil (0–5 cm) | Bacterial abundance |
|---------|---------------|---------------------|
| 33%     | 67%           |                     |
| 1       | Unsuitable    | Low                 |
| 2       | Unsuitable    | General             |
| 3       | Unsuitable    | Suitable            |
| 4       | General       | Unsuitable          |
| 5       | General       | General             |
| 6       | General       | Suitable            |
| 7       | Suitable      | Unsuitable          |
| 8       | Suitable      | General             |
| 9       | Suitable      | Suitable            |

| Arid/humid Region | Temperature Zone  | Climate                   |
|-------------------|-------------------|---------------------------|
| 62%               | 38%               |                           |
| 1                 | Arid region       | Subfrigid/Cold-temp. zone |
| 2                 | Arid region       | Middle temp. zone         |
| 3                 | Arid region       | Warm temp. zone           |
| 4                 | Arid region       | Subtropical zone          |
| 5                 | Arid region       | Tropical zone             |
| 6                 | Semi-arid region  | Subfrigid/Cold-temp. zone |
| 7                 | Semi-arid region  | Middle temp. zone         |
| 8                 | Semi-arid region  | Warm temp. zone           |
| 9                 | Semi-arid region  | Subtropical zone          |
| 10                | Semi-arid region  | Tropical zone             |
| 11                | Semi-humid region | Subfrigid/Cold-temp. zone |
| 12                | Semi-humid region | Middle temp. zone         |
| 13                | Semi-humid region | Warm temp. zone           |
| 14                | Semi-humid region | Subtropical zone          |
| 15                | Semi-humid region | Tropical zone             |
| 16                | Humid region      | Subfrigid/Cold-temp. zone |
| 17                | Humid region      | Middle temp. zone         |
| 18                | Humid region      | Warm temp. zone           |
| 19                | Humid region      | Subtropical zone          |
| 20                | Humid region      | Tropical zone             |

| pH (0–5 cm) | Nutrient (0–5 cm) | Texture (0–5 cm, USDA)      | Soil (0–5 cm) |
|-------------|-------------------|-----------------------------|---------------|
| 42%         | 39%               | 19%                         |               |
| 1 3.6–5.3   | Unsuitable        | Sand, Loam sand, Sandy loam | Unsuitable    |
| 2 3.6–5.3   | Unsuitable        | Silt, Loam, Silt loam       | Unsuitable    |
| 3 3.6–5.3   | Unsuitable        | Others                      | Unsuitable    |
| 4 3.6–5.3   | General           | Sand, Loam sand, Sandy loam | Unsuitable    |
| 5 3.6–5.3   | General           | Silt, Loam, Silt loam       | Unsuitable    |
| 6 3.6–5.3   | General           | Others                      | General       |
| 7 3.6–5.3   | Suitable          | Sand, Loam sand, Sandy loam | General       |
| 8 3.6–5.3   | Suitable          | Silt, Loam, Silt loam       | General       |
| 9 3.6–5.3   | Suitable          | Others                      | General       |
| 10 5.3–6.3  | Unsuitable        | Sand, Loam sand, Sandy loam | Unsuitable    |
| 11 5.3–6.3  | Unsuitable        | Silt, Loam, Silt loam       | General       |
| 12 5.3–6.3  | Unsuitable        | Others                      | General       |
| 13 5.3–6.3  | General           | Sand, Loam sand, Sandy loam | General       |
| 14 5.3–6.3  | General           | Silt, Loam, Silt loam       | General       |
| 15 5.3–6.3  | General           | Others                      | General       |
| 16 5.3–6.3  | Suitable          | Sand, Loam sand, Sandy loam | General       |
| 17 5.3–6.3  | Suitable          | Silt, Loam, Silt loam       | General       |
| 18 5.3–6.3  | Suitable          | Others                      | General       |
| 19 8.0–9.4  | Unsuitable        | Sand, Loam sand, Sandy loam | General       |
| 20 8.0–9.4  | Unsuitable        | Silt, Loam, Silt loam       | General       |
| 21 8.0–9.4  | Unsuitable        | Others                      | General       |
| 22 8.0–9.4  | General           | Sand, Loam sand, Sandy loam | General       |
| 23 8.0–9.4  | General           | Silt, Loam, Silt loam       | General       |
| 24 8.0–9.4  | General           | Others                      | General       |
| 25 8.0–9.4  | Suitable          | Sand, Loam sand, Sandy loam | General       |
| 26 8.0–9.4  | Suitable          | Silt, Loam, Silt loam       | General       |
| 27 8.0–9.4  | Suitable          | Others                      | Suitable      |
| 28 6.3–8.0  | Unsuitable        | Sand, Loam sand, Sandy loam | General       |
| 29 6.3–8.0  | Unsuitable        | Silt, Loam, Silt loam       | General       |
| 30 6.3–8.0  | Unsuitable        | Others                      | General       |
| 31 6.3–8.0  | General           | Sand, Loam sand, Sandy loam | General       |
| 32 6.3–8.0  | General           | Silt, Loam, Silt loam       | Suitable      |
| 33 6.3–8.0  | General           | Others                      | Suitable      |
| 34 6.3–8.0  | Suitable          | Sand, Loam sand, Sandy loam | Suitable      |
| 35 6.3–8.0  | Suitable          | Silt, Loam, Silt loam       | Suitable      |
| 36 6.3–8.0  | Suitable          | Others                      | Suitable      |

| C/N (0–5 cm) | SOC (0–5 cm, g/kg) | Nutrient (0–5 cm) |
|--------------|--------------------|-------------------|
| 50%          | 50%                |                   |
| 1 2–10       | 0.8–9.9            | Unsuitable        |
| 2 2–10       | 9.9–26.9           | Unsuitable        |
| 3 2–10       | 26.9–131.2         | General           |
| 4 10–12      | 0.8–9.9            | Unsuitable        |
| 5 10–12      | 9.9–26.9           | General           |
| 6 10–12      | 26.9–131.2         | Suitable          |
| 7 12–38      | 0.8–9.9            | General           |
| 8 12–38      | 9.9–26.9           | Suitable          |
| 9 12–38      | 26.9–131.2         | Suitable          |

| Climate      | Soil (0–15 cm) | Nematode abundance |
|--------------|----------------|--------------------|
| 33%          | 67%            |                    |
| 1 Unsuitable | Unsuitable     | Low                |
| 2 Unsuitable | General        | Medium             |
| 3 Unsuitable | Suitable       | Medium             |
| 4 General    | Unsuitable     | Low                |
| 5 General    | General        | Medium             |
| 6 General    | Suitable       | High               |
| 7 Suitable   | Unsuitable     | Medium             |
| 8 Suitable   | General        | Medium             |
| 9 Suitable   | Suitable       | High               |

| Arid/humid Region      | Temperature Zone                 | Climate           |
|------------------------|----------------------------------|-------------------|
| 67%                    | 33%                              |                   |
| 1 <b>Arid region</b>   | <b>Tropical zone</b>             | <b>Unsuitable</b> |
| 2 <b>Arid region</b>   | Subtropical zone                 | <b>Unsuitable</b> |
| 3 <b>Arid region</b>   | Warm temp. zone                  | <b>Unsuitable</b> |
| 4 <b>Arid region</b>   | Middle temp. zone                | <b>Unsuitable</b> |
| 5 <b>Arid region</b>   | <b>Subfrigid/Cold-temp. zone</b> | General           |
| 6 Semi-arid region     | <b>Tropical zone</b>             | <b>Unsuitable</b> |
| 7 Semi-arid region     | Subtropical zone                 | General           |
| 8 Semi-arid region     | Warm temp. zone                  | General           |
| 9 Semi-arid region     | Middle temp. zone                | General           |
| 10 Semi-arid region    | <b>Subfrigid/Cold-temp. zone</b> | General           |
| 11 Semi-humid region   | <b>Tropical zone</b>             | General           |
| 12 Semi-humid region   | Subtropical zone                 | General           |
| 13 Semi-humid region   | Warm temp. zone                  | <b>Suitable</b>   |
| 14 Semi-humid region   | Middle temp. zone                | <b>Suitable</b>   |
| 15 Semi-humid region   | <b>Subfrigid/Cold-temp. zone</b> | <b>Suitable</b>   |
| 16 <b>Humid region</b> | <b>Tropical zone</b>             | General           |
| 17 <b>Humid region</b> | Subtropical zone                 | General           |
| 18 <b>Humid region</b> | Warm temp. zone                  | <b>Suitable</b>   |
| 19 <b>Humid region</b> | Middle temp. zone                | <b>Suitable</b>   |
| 20 <b>Humid region</b> | <b>Subfrigid/Cold-temp. zone</b> | <b>Suitable</b>   |

| pH (0–15 cm)      | CEC (0–15 cm, cmol(+)/kg) | SOC (0–15 cm, g/kg) | Soil (0–15 cm)    |
|-------------------|---------------------------|---------------------|-------------------|
| 31%               | 35%                       | 35%                 |                   |
| 1 <b>3.7–5.4</b>  | <b>4.9–15.0</b>           | <b>0.8–10.2</b>     | <b>Unsuitable</b> |
| 2 <b>3.7–5.4</b>  | <b>4.9–15.0</b>           | 10.2–26.2           | <b>Unsuitable</b> |
| 3 <b>3.7–5.4</b>  | <b>4.9–15.0</b>           | <b>26.2–121.7</b>   | General           |
| 4 <b>3.7–5.4</b>  | 15.0–23.6                 | <b>0.8–10.2</b>     | <b>Unsuitable</b> |
| 5 <b>3.7–5.4</b>  | 15.0–23.6                 | 10.2–26.2           | General           |
| 6 <b>3.7–5.4</b>  | 15.0–23.6                 | <b>26.2–121.7</b>   | General           |
| 7 <b>3.7–5.4</b>  | <b>23.6–97.4</b>          | <b>0.8–10.2</b>     | General           |
| 8 <b>3.7–5.4</b>  | <b>23.6–97.4</b>          | 10.2–26.2           | General           |
| 9 <b>3.7–5.4</b>  | <b>23.6–97.4</b>          | <b>26.2–121.7</b>   | General           |
| 10 5.4–6.3        | <b>4.9–15.0</b>           | <b>0.8–10.2</b>     | <b>Unsuitable</b> |
| 11 5.4–6.3        | <b>4.9–15.0</b>           | 10.2–26.2           | General           |
| 12 5.4–6.3        | <b>4.9–15.0</b>           | <b>26.2–121.7</b>   | General           |
| 13 5.4–6.3        | 15.0–23.6                 | <b>0.8–10.2</b>     | General           |
| 14 5.4–6.3        | 15.0–23.6                 | 10.2–26.2           | General           |
| 15 5.4–6.3        | 15.0–23.6                 | <b>26.2–121.7</b>   | General           |
| 16 5.4–6.3        | <b>23.6–97.4</b>          | <b>0.8–10.2</b>     | General           |
| 17 5.4–6.3        | <b>23.6–97.4</b>          | 10.2–26.2           | General           |
| 18 5.4–6.3        | <b>23.6–97.4</b>          | <b>26.2–121.7</b>   | General           |
| 19 7.9–9.4        | <b>4.9–15.0</b>           | <b>0.8–10.2</b>     | General           |
| 20 7.9–9.4        | <b>4.9–15.0</b>           | 10.2–26.2           | General           |
| 21 7.9–9.4        | <b>4.9–15.0</b>           | <b>26.2–121.7</b>   | General           |
| 22 7.9–9.4        | 15.0–23.6                 | <b>0.8–10.2</b>     | General           |
| 23 7.9–9.4        | 15.0–23.6                 | 10.2–26.2           | General           |
| 24 7.9–9.4        | 15.0–23.6                 | <b>26.2–121.7</b>   | General           |
| 25 7.9–9.4        | <b>23.6–97.4</b>          | <b>0.8–10.2</b>     | General           |
| 26 7.9–9.4        | <b>23.6–97.4</b>          | 10.2–26.2           | General           |
| 27 7.9–9.4        | <b>23.6–97.4</b>          | <b>26.2–121.7</b>   | <b>Suitable</b>   |
| 28 <b>6.3–7.9</b> | <b>4.9–15.0</b>           | <b>0.8–10.2</b>     | General           |
| 29 <b>6.3–7.9</b> | <b>4.9–15.0</b>           | 10.2–26.2           | General           |
| 30 <b>6.3–7.9</b> | <b>4.9–15.0</b>           | <b>26.2–121.7</b>   | General           |
| 31 <b>6.3–7.9</b> | 15.0–23.6                 | <b>0.8–10.2</b>     | General           |
| 32 <b>6.3–7.9</b> | 15.0–23.6                 | 10.2–26.2           | General           |
| 33 <b>6.3–7.9</b> | 15.0–23.6                 | <b>26.2–121.7</b>   | <b>Suitable</b>   |
| 34 <b>6.3–7.9</b> | <b>23.6–97.4</b>          | <b>0.8–10.2</b>     | General           |
| 35 <b>6.3–7.9</b> | <b>23.6–97.4</b>          | 10.2–26.2           | <b>Suitable</b>   |
| 36 <b>6.3–7.9</b> | <b>23.6–97.4</b>          | <b>26.2–121.7</b>   | <b>Suitable</b>   |

| Climate             | Soil (0–30 cm)    | Earthworm diversity |
|---------------------|-------------------|---------------------|
| 50%                 | 50%               |                     |
| 1 <b>Unsuitable</b> | <b>Unsuitable</b> | <b>Low</b>          |
| 2 <b>Unsuitable</b> | General           | <b>Low</b>          |
| 3 <b>Unsuitable</b> | <b>Suitable</b>   | Medium              |
| 4 General           | <b>Unsuitable</b> | <b>Low</b>          |
| 5 General           | General           | Medium              |
| 6 General           | <b>Suitable</b>   | <b>High</b>         |
| 7 <b>Suitable</b>   | <b>Unsuitable</b> | Medium              |
| 8 <b>Suitable</b>   | General           | <b>High</b>         |
| 9 <b>Suitable</b>   | <b>Suitable</b>   | <b>High</b>         |

| Arid/humid Region      | Temperature Zone                 | Climate           |
|------------------------|----------------------------------|-------------------|
| 62%                    | 38%                              |                   |
| 1 <b>Arid region</b>   | <b>Subfrigid/Cold-temp. zone</b> | <b>Unsuitable</b> |
| 2 <b>Arid region</b>   | Middle temp. zone                | <b>Unsuitable</b> |
| 3 <b>Arid region</b>   | Warm temp. zone                  | <b>Unsuitable</b> |
| 4 <b>Arid region</b>   | Subtropical zone                 | General           |
| 5 <b>Arid region</b>   | <b>Tropical zone</b>             | General           |
| 6 Semi-arid region     | <b>Subfrigid/Cold-temp. zone</b> | <b>Unsuitable</b> |
| 7 Semi-arid region     | Middle temp. zone                | General           |
| 8 Semi-arid region     | Warm temp. zone                  | General           |
| 9 Semi-arid region     | Subtropical zone                 | General           |
| 10 Semi-arid region    | <b>Tropical zone</b>             | General           |
| 11 Semi-humid region   | <b>Subfrigid/Cold-temp. zone</b> | General           |
| 12 Semi-humid region   | Middle temp. zone                | General           |
| 13 Semi-humid region   | Warm temp. zone                  | General           |
| 14 Semi-humid region   | Subtropical zone                 | General           |
| 15 Semi-humid region   | <b>Tropical zone</b>             | <b>Suitable</b>   |
| 16 <b>Humid region</b> | <b>Subfrigid/Cold-temp. zone</b> | General           |
| 17 <b>Humid region</b> | Middle temp. zone                | General           |
| 18 <b>Humid region</b> | Warm temp. zone                  | <b>Suitable</b>   |
| 19 <b>Humid region</b> | Subtropical zone                 | <b>Suitable</b>   |
| 20 <b>Humid region</b> | <b>Tropical zone</b>             | <b>Suitable</b>   |

| pH (0–30 cm)      | SOC (0–30 cm, g/kg) | Texture (0–30 cm, USDA)            | Soil (0–30 cm)    |
|-------------------|---------------------|------------------------------------|-------------------|
| 33%               | 33%                 | 33%                                |                   |
| 1 <b>8.0–9.5</b>  | <b>1.2–8.7</b>      | <b>Sand, Loam sand, Sandy loam</b> | <b>Unsuitable</b> |
| 2 <b>8.0–9.5</b>  | <b>1.2–8.7</b>      | Sandy clay, Silt clay, Clay        | <b>Unsuitable</b> |
| 3 <b>8.0–9.5</b>  | <b>1.2–8.7</b>      | <b>Others</b>                      | General           |
| 4 <b>8.0–9.5</b>  | 8.7–21.5            | <b>Sand, Loam sand, Sandy loam</b> | <b>Unsuitable</b> |
| 5 <b>8.0–9.5</b>  | 8.7–21.5            | Sandy clay, Silt clay, Clay        | General           |
| 6 <b>8.0–9.5</b>  | 8.7–21.5            | <b>Others</b>                      | General           |
| 7 <b>8.0–9.5</b>  | <b>21.5–107.8</b>   | <b>Sand, Loam sand, Sandy loam</b> | General           |
| 8 <b>8.0–9.5</b>  | <b>21.5–107.8</b>   | Sandy clay, Silt clay, Clay        | General           |
| 9 <b>8.0–9.5</b>  | <b>21.5–107.8</b>   | <b>Others</b>                      | General           |
| 10 3.9–6.1        | <b>1.2–8.7</b>      | <b>Sand, Loam sand, Sandy loam</b> | <b>Unsuitable</b> |
| 11 3.9–6.1        | <b>1.2–8.7</b>      | Sandy clay, Silt clay, Clay        | General           |
| 12 3.9–6.1        | <b>1.2–8.7</b>      | <b>Others</b>                      | General           |
| 13 3.9–6.1        | 8.7–21.5            | <b>Sand, Loam sand, Sandy loam</b> | General           |
| 14 3.9–6.1        | 8.7–21.5            | Sandy clay, Silt clay, Clay        | General           |
| 15 3.9–6.1        | 8.7–21.5            | <b>Others</b>                      | General           |
| 16 3.9–6.1        | <b>21.5–107.8</b>   | <b>Sand, Loam sand, Sandy loam</b> | General           |
| 17 3.9–6.1        | <b>21.5–107.8</b>   | Sandy clay, Silt clay, Clay        | General           |
| 18 3.9–6.1        | <b>21.5–107.8</b>   | <b>Others</b>                      | <b>Suitable</b>   |
| 19 <b>6.1–8.0</b> | <b>1.2–8.7</b>      | <b>Sand, Loam sand, Sandy loam</b> | General           |
| 20 <b>6.1–8.0</b> | <b>1.2–8.7</b>      | Sandy clay, Silt clay, Clay        | General           |
| 21 <b>6.1–8.0</b> | <b>1.2–8.7</b>      | <b>Others</b>                      | General           |
| 22 <b>6.1–8.0</b> | 8.7–21.5            | <b>Sand, Loam sand, Sandy loam</b> | General           |
| 23 <b>6.1–8.0</b> | 8.7–21.5            | Sandy clay, Silt clay, Clay        | General           |
| 24 <b>6.1–8.0</b> | 8.7–21.5            | <b>Others</b>                      | <b>Suitable</b>   |
| 25 <b>6.1–8.0</b> | <b>21.5–107.8</b>   | <b>Sand, Loam sand, Sandy loam</b> | General           |
| 26 <b>6.1–8.0</b> | <b>21.5–107.8</b>   | Sandy clay, Silt clay, Clay        | <b>Suitable</b>   |
| 27 <b>6.1–8.0</b> | <b>21.5–107.8</b>   | <b>Others</b>                      | <b>Suitable</b>   |
